# Supplementary material for: Exploring the diversity of elastic responses of crystalline cadmium(ii) coordination polymers: from elastic towards plastic and brittle responses
Source: Royal Society of Chemistry journal article supplement (doi:10.1039/d1ce00797a), 2021-01-01
Supplement: d1ce00797a1.pdf [file d1ce00797a1.pdf]

# Exploring the diversity of elastic responses of crystalline cadmium(II) coordination polymers: From elastic towards plastic and brittle

Mateja Pisačić,<sup>a</sup> Ivan Kodrin,<sup>a</sup> Ivana Biljan,<sup>a</sup> and Marijana Đaković<sup>a\*</sup>

<sup>a</sup>*Department of Chemistry, Faculty of Science, University of Zagreb, Zagreb, Croatia*

Supplementary information

## Table of Contents

|                                      |    |
|--------------------------------------|----|
| 1. Synthesis .....                   | 3  |
| 2. Intermolecular interactions ..... | 4  |
| 3. Crystal bending experiments ..... | 7  |
| 4. Atomic force microscopy .....     | 14 |
| 5. Computational study.....          | 16 |
| 6. References .....                  | 20 |

## 1. Synthesis

### Crystal growth

Crystals (**1–3**) were grown in test tubes by layering an aqueous solution of cadmium(II) salt with pure ethanol (1 mL) and then with an ethanol solution of the corresponding ligand.

$[\text{CdCl}_2(3\text{-Clpy})_2]_n$ , (**1, IPAYED**). Used:  $\text{CdCl}_2$  aqueous solution (1 mL,  $0.048 \text{ mol dm}^{-3}$ ), 3-Clpy ethanol solution (2 mL,  $0.050 \text{ mol dm}^{-3}$ ).

$[\text{CdCl}_2(3\text{-Brpy})_2]_n$ , (**2, IPAYUT**). Used:  $\text{CdCl}_2$  aqueous solution (1 mL,  $0.051 \text{ mol dm}^{-3}$ ), 3-Brpy ethanol solution (2 mL,  $0.049 \text{ mol dm}^{-3}$ ).

$[\text{CdBr}_2(3\text{-Brpy})_2]_n$ , (**3, IPAZAA**). Used:  $\text{CdBr}_2$  aqueous solution (1 mL,  $0.053 \text{ mol dm}^{-3}$ ), 3-Brpy ethanol solution (2 mL,  $0.049 \text{ mol dm}^{-3}$ ).

## 2. Intermolecular interactions

**Table S1.** Details on hydrogen bond geometry (Å, °) for **1–3**.

| D—H···A                    | $d(\text{H}\cdots\text{A}) / \text{Å}$ | $d(\text{D}\cdots\text{A}) / \text{Å}$ | $\angle (\text{D}-\text{H}\cdots\text{A}) / ^\circ$ | $R_{\text{HX}}^a$ |
|----------------------------|----------------------------------------|----------------------------------------|-----------------------------------------------------|-------------------|
| <b>1 (IPAYED)</b>          |                                        |                                        |                                                     |                   |
| C3—H2···Cl2 <sup>i</sup>   | 2.98                                   | 3.830(6)                               | 145.0                                               | 1.01              |
| C4—H3···Cl1 <sup>ii</sup>  | 2.87                                   | 3.646(6)                               | 136.0                                               | 0.97              |
| C5—H4···Cl2 <sup>iii</sup> | 3.04                                   | 3.910(5)                               | 149.0                                               | 1.03              |
| <b>2 (IPAYUT)</b>          |                                        |                                        |                                                     |                   |
| C3—H2···Br1 <sup>i</sup>   | 3.05                                   | 3.903(4)                               | 146.0                                               | 0.99              |
| C4—H3···Cl1 <sup>ii</sup>  | 2.95                                   | 3.736(4)                               | 138.0                                               | 1.00              |
| C5—H4···Br1 <sup>iii</sup> | 3.00                                   | 3.875(4)                               | 150.0                                               | 0.98              |
| <b>3 (IPAZAA)</b>          |                                        |                                        |                                                     |                   |
| C3—H2···Br2 <sup>i</sup>   | 3.14                                   | 4.003(3)                               | 148.0                                               | 1.03              |
| C4—H3···Br1 <sup>ii</sup>  | 3.01                                   | 3.777(4)                               | 136.0                                               | 0.98              |
| C5—H4···Br2 <sup>iii</sup> | 3.17                                   | 4.027(3)                               | 147.0                                               | 1.04              |

<sup>a</sup> The normalized distance,  $R$ , defined according to Lommerse *et al.*<sup>1</sup>  $R_{\text{HX}} = d(\text{H}\cdots\text{A}) / (r_{\text{H}} + r_{\text{A}})$ , where  $r_{\text{H}}$  and  $r_{\text{A}}$  are the Bondi van der Waals radii of the respective hydrogen-bond donor and acceptor atoms (H 1.20, Cl 1.75 or Br 1.86 Å) in the C—H···X hydrogen bond.

Symmetry codes (i):  $-x, -y+1, -z$ ; (ii)  $-x-1, y+1/2, -z-1/2$ ; (iii):  $-x+1/2, y+1/2, -z+1/2$

**Table S2.** Details on halogen bond geometry (Å, °) for **1–3**.

| D—X1···X2                 | $d(\text{X1}\cdots\text{X2}) / \text{Å}$ | $\angle (\text{D}-\text{X}\cdots\text{A}) / ^\circ$ | $R_{\text{X1X2}}^a$ |
|---------------------------|------------------------------------------|-----------------------------------------------------|---------------------|
| <b>1 (IPAYIH)</b>         |                                          |                                                     |                     |
| C2—Cl2···Cl1 <sup>i</sup> | 3.617(2)                                 | 164.01(18)                                          | 1.033               |
| <b>2 (IPAYON)</b>         |                                          |                                                     |                     |
| C2—Br1···Cl1 <sup>i</sup> | 3.5704(12)                               | 164.58(11)                                          | 0.989               |
| <b>3 (IPAZEE)</b>         |                                          |                                                     |                     |
| C2—Br2···Br1 <sup>i</sup> | 3.6260(14)                               | 166.37(10)                                          | 0.975               |

<sup>a</sup> The normalized distance,  $R$ , defined according to Lommerse *et al.*<sup>1</sup>  $R_{\text{X1X2}} = d(\text{X1}\cdots\text{X2}) / (r_1 + r_2)$ , where  $r_1$  and  $r_2$  are the Bondi van der Waals radii of the respective halogen atoms (Cl 1.75 or Br 1.86 Å) in the D—X1···X2 halogen bond.

Symmetry code: (i):  $1+x, 1/2-y, 1/2+z$

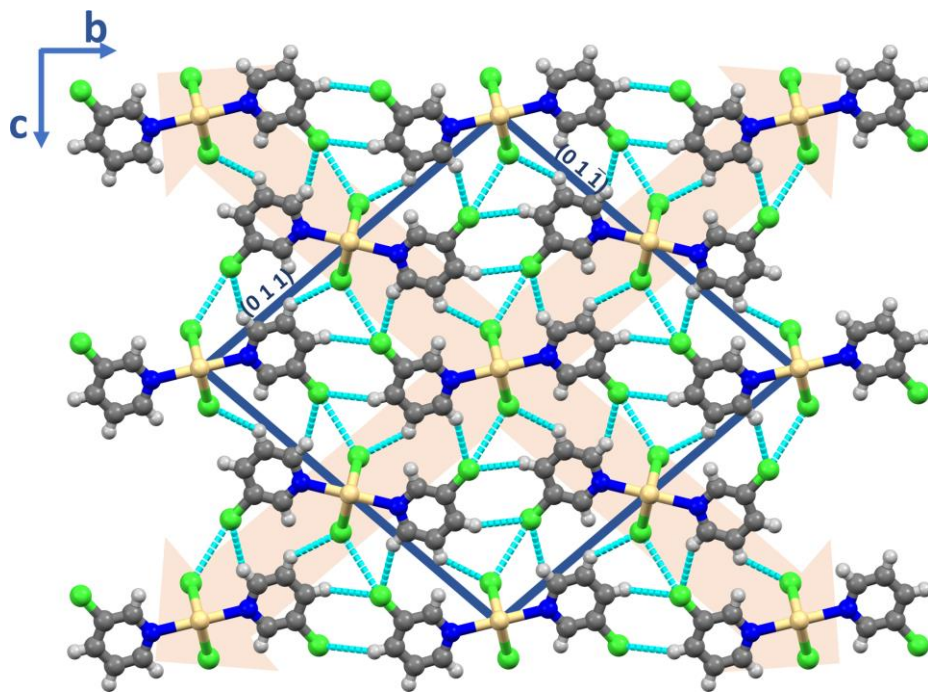

$[\text{CdCl}_2(3\text{-Clpy})_2]_n$  (1)

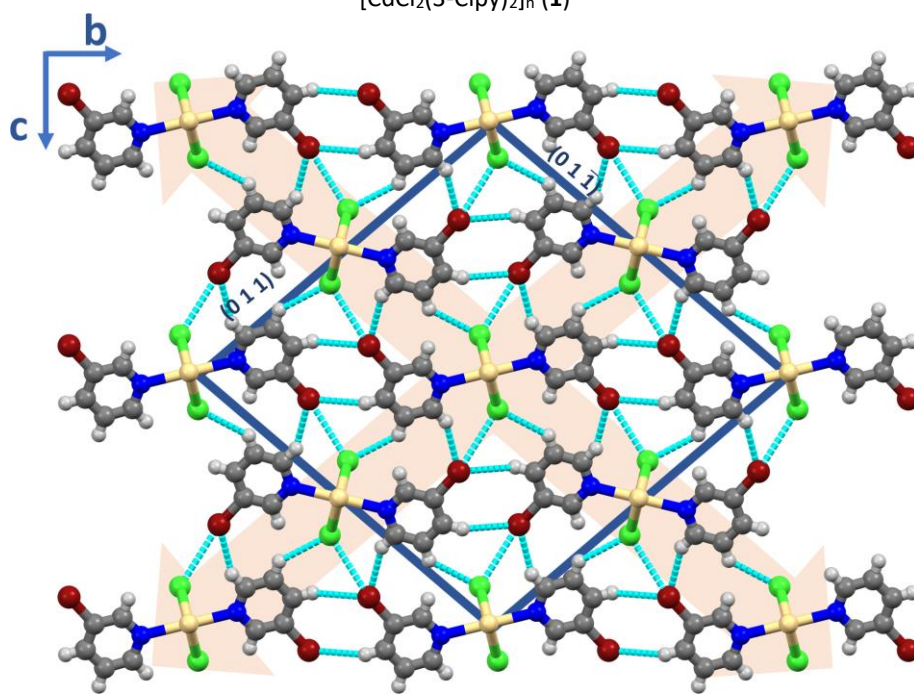

$[\text{CdCl}_2(3\text{-Brpy})_2]_n$  (2)

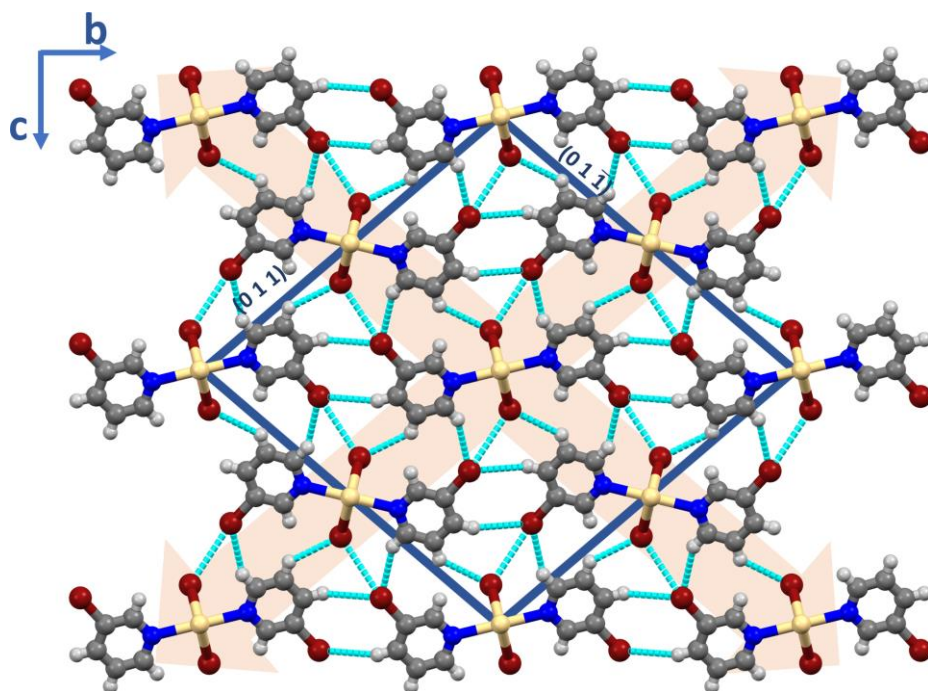

$[\text{CdBr}_2(3\text{-Brpy})_2]_n$  (**3**)

**Figure S1.** The relative orientation of adjacent polymeric chains (a view down the  $a$  axis) in the crystal structures of **1–3**, linked via halogen and hydrogen bonds listed in tables S1 and S2, shown as blue dotted lines, forming a 2-D network in the directions orthogonal to the elongation of the crystal. Crystal faces  $(011)/(0\bar{1}\bar{1})$  and  $(0\bar{1}1)/(01\bar{1})$  are indicated by blue lines. Directions along which the mechanical force is applied are indicated by pale orange arrows.

### 3. Crystal bending experiments

The extent of elastic response of the crystals **1–3** was quantified using Euler-Bernoulli equation.<sup>2</sup> For that purpose, thickness ( $t$ ) of the crystals, together with the distance between the tips of metal tweezers holding the bent crystal ( $L$ ) and maximal displacement ( $h_{max}$ ) at a point of maximal curvature, i.e. just before the breakage of a crystal, were measured (Figure S2). The radius of circle describing curvature of bent crystal was calculated using geometrical construction presented in Figure S2 [1, 2]:

$$R^2 = \left(\frac{L}{2}\right)^2 + (R - h_{max})^2 \quad [1]$$

$$R = \frac{\left(\frac{L}{2}\right)^2 + h_{max}^2}{2h_{max}} \quad [2]$$

The bending strain was calculated from Euler-Bernoulli equation [3]<sup>2</sup> (considering pure bending without shear component):

$$\varepsilon (\%) = \frac{t}{R} \cdot 100 \quad [3]$$

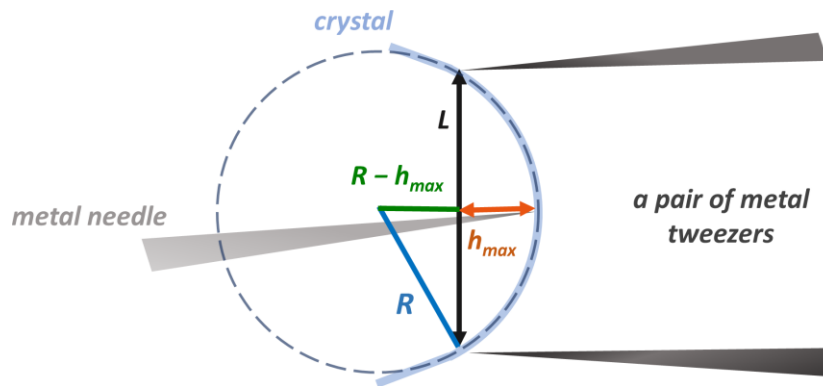

**Figure S2.** Schematic representation of three-point bending experiment highlighting measured (black arrow, distance between tips of metal tweezers,  $L$ ; orange arrow, maximal displacement,  $h_{max}$ ) and calculated (blue line, radius of the circle approximating the curvature of the bent crystal,  $R$ ) geometrical parameters needed for determining bending strain ( $\varepsilon$ ).

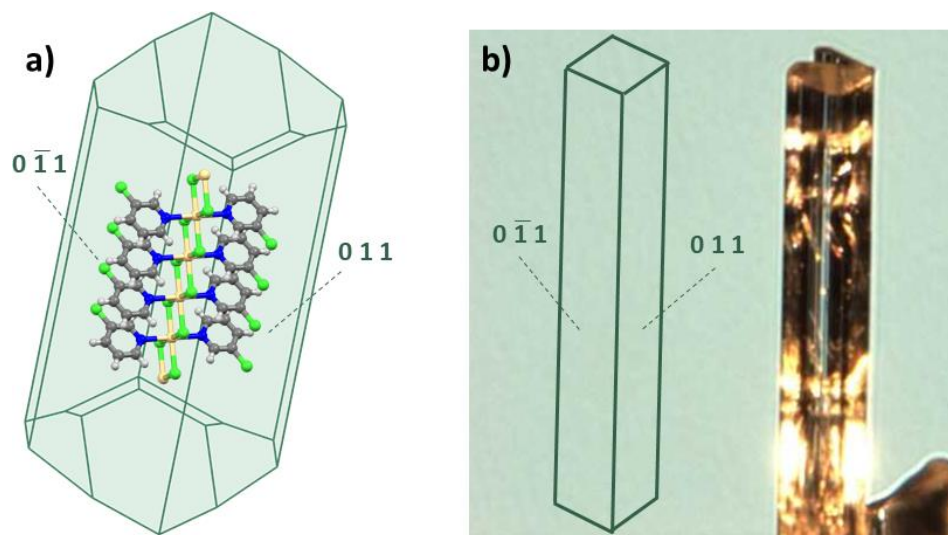

**Figure S3.** Face indexing (a) and calculated BFDH morphology (using Mercury 4.3.1)<sup>3</sup> (b) for  $[\text{CdCl}_2(3\text{-Clpy})_2]_n$  (**1**).

**Table S3.** Geometrical parameters used to calculate bending strain ( $\epsilon$ ). The mean value of the bending strain (shown in red) was determined on the basis of measurements of ten different crystals for the compound **1** (from several different batches) by applying mechanical force on the  $(011)/(\bar{0}\bar{1}\bar{1})$  or  $(\bar{0}\bar{1}\bar{1})/(011)$  pair of crystal faces. Thickness ( $t$ ) of the selected crystals was measured before bending, while length ( $L$ ) and maximal displacement ( $h_{\text{max}}$ ) were measured at the point of maximal curvature (see Figure S4 below).

| Sample  | $\bar{t}$ / mm | $L$ / mm | $h_{\text{max}}$ / mm | $R$ / mm | $\epsilon$ / mm    |
|---------|----------------|----------|-----------------------|----------|--------------------|
| 1-1     | 0.016          | 2.277    | 0.573                 | 1.418    | <b>0.58</b>        |
| 1-2     | 0.008          | 0.933    | 0.412                 | 0.470    | <b>0.85</b>        |
| 1-3     | 0.015          | 1.999    | 0.553                 | 1.180    | <b>0.65</b>        |
| 1-4     | 0.022          | 2.368    | 0.498                 | 1.656    | <b>0.66</b>        |
| 1-5     | 0.028          | 2.255    | 0.261                 | 2.566    | <b>0.55</b>        |
| 1-6     | 0.031          | 1.850    | 0.223                 | 2.030    | <b>0.76</b>        |
| 1-7     | 0.015          | 1.837    | 0.606                 | 0.999    | <b>0.73</b>        |
| 1-8     | 0.017          | 1.596    | 0.418                 | 0.971    | <b>0.88</b>        |
| 1-9     | 0.021          | 2.211    | 0.706                 | 1.219    | <b>0.86</b>        |
| 1-10    | 0.028          | 2.387    | 0.345                 | 2.237    | <b>0.62</b>        |
| average |                |          |                       |          | <b>0.71 ± 0.12</b> |



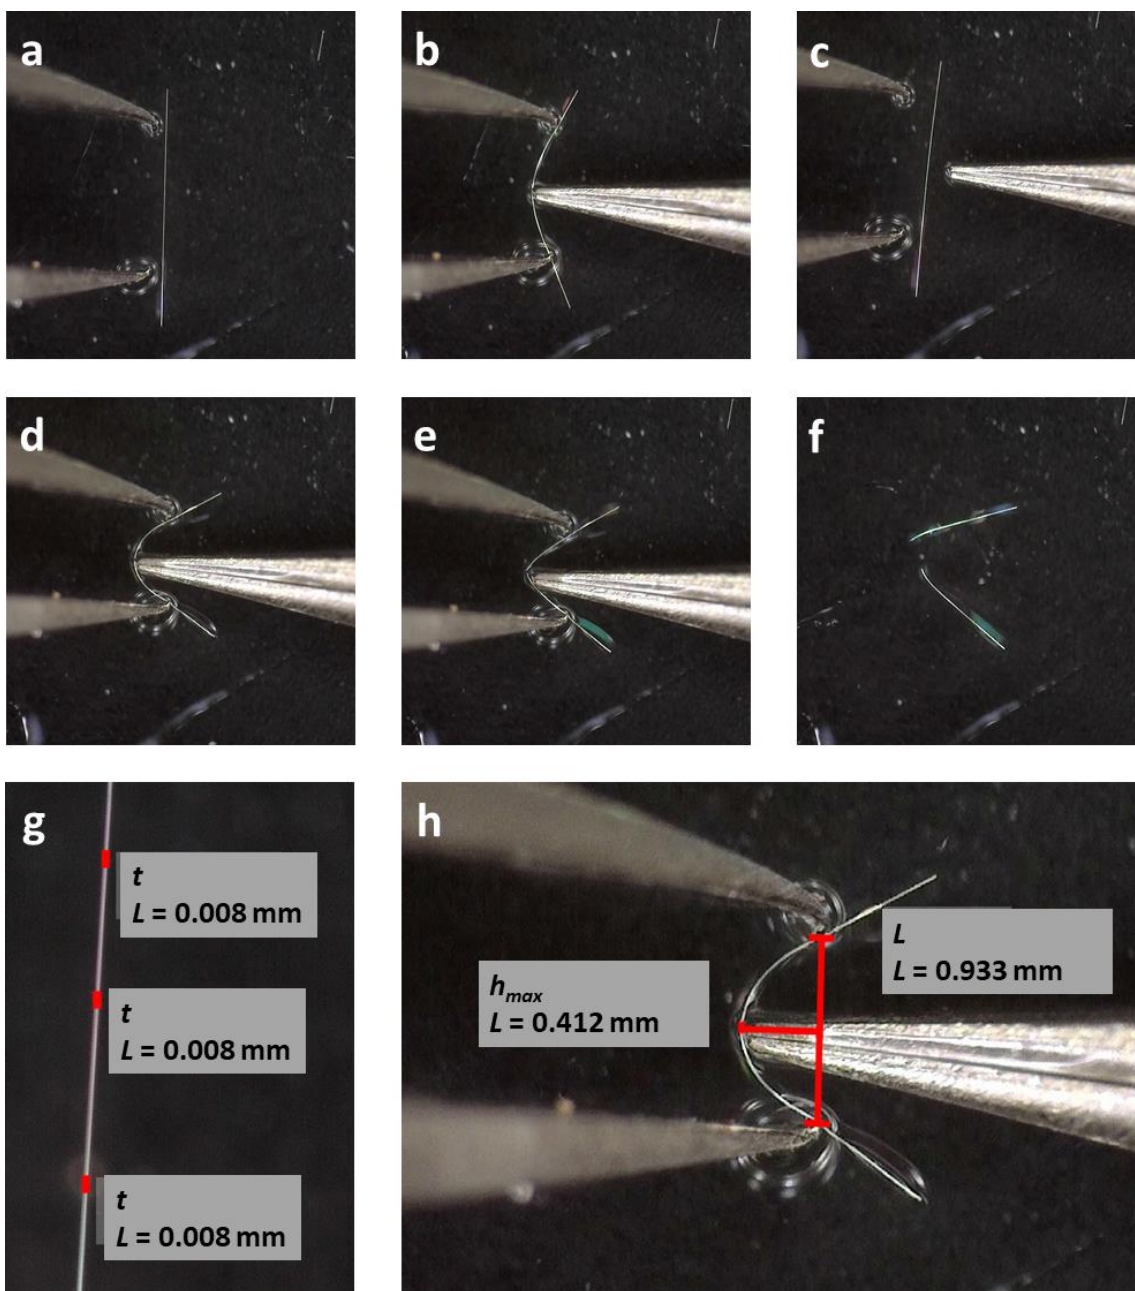

**Figure S4.** Bending experiment with  $[\text{CdCl}_2(3\text{-Clpy})_2]_n$  (**1**, sample **1-2**; images a–f, h magnified 50 times; image g magnified 200 times),  $\varepsilon = 0.85$  %. Slight elastic bending of the crystal followed by relaxation (a–c); the crystal fractures once bent over the critical radius (d–f) with plastically deformed ends of the broken crystal (f). Geometrical parameters: (g) thickness,  $t$ , (h) length,  $L$ , and maximal displacement,  $h$ .

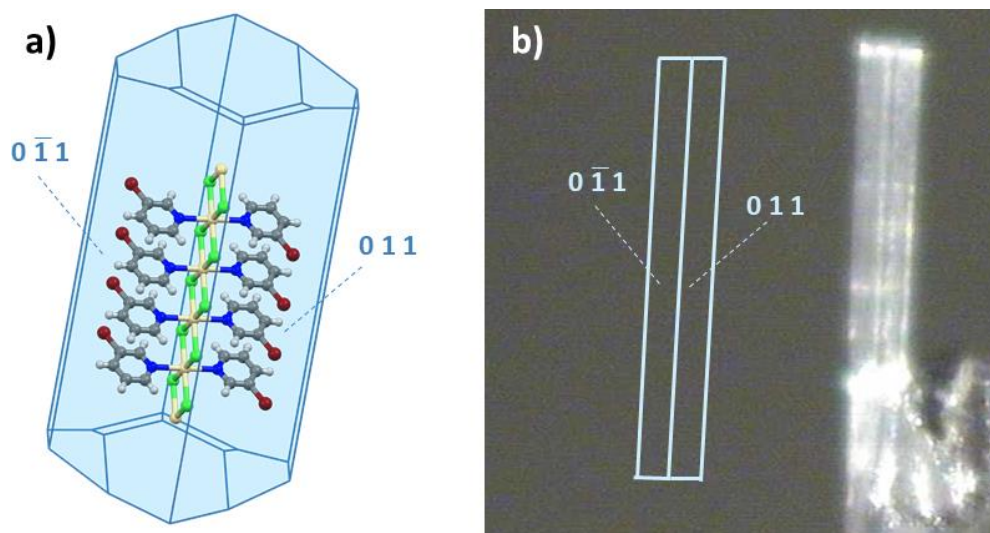

**Figure S5.** Face indexing (a) and calculated BFDH morphology (using Mercury 4.3.1)<sup>3</sup> (b) for  $[\text{CdCl}_2(3\text{-Brpy})_2]_n$  (**2**).

**Table S4.** Geometrical parameters used to calculate bending strain ( $\epsilon$ ). The mean value of the bending strain (shown in red) was determined on the basis of measurements of ten different crystals for the compound **2** (from several different batches) by applying mechanical force on the  $(011)/(0\bar{1}1)$  or  $(0\bar{1}1)/(011)$  pair of crystal faces. Thickness ( $t$ ) of the selected crystals was measured before bending, length ( $L$ ) and maximal displacement ( $h_{\text{max}}$ ) were measured at the point of maximal curvature (see Figure S6 below).

| Sample  | $\bar{t}$ / mm | $L$ / mm | $h_{\text{max}}$ / mm | $R$ / mm | $\epsilon$ / mm    |
|---------|----------------|----------|-----------------------|----------|--------------------|
| 2-1     | 0.016          | 1.624    | 0.198                 | 1.764    | <b>0.46</b>        |
| 2-2     | 0.019          | 2.023    | 0.248                 | 2.187    | <b>0.44</b>        |
| 2-3     | 0.023          | 1.415    | 0.125                 | 2.065    | <b>0.56</b>        |
| 2-4     | 0.030          | 1.982    | 0.150                 | 3.349    | <b>0.45</b>        |
| 2-5     | 0.026          | 1.236    | 0.094                 | 2.079    | <b>0.63</b>        |
| 2-6     | 0.019          | 1.478    | 0.115                 | 2.432    | <b>0.40</b>        |
| 2-7     | 0.032          | 1.366    | 0.061                 | 3.854    | <b>0.41</b>        |
| 2-8     | 0.031          | 2.333    | 0.229                 | 3.086    | <b>0.50</b>        |
| 2-9     | 0.022          | 1.561    | 0.128                 | 2.444    | <b>0.45</b>        |
| 2-10    | 0.014          | 1.061    | 0.081                 | 1.778    | <b>0.38</b>        |
| average |                |          |                       |          | <b>0.47 ± 0.08</b> |

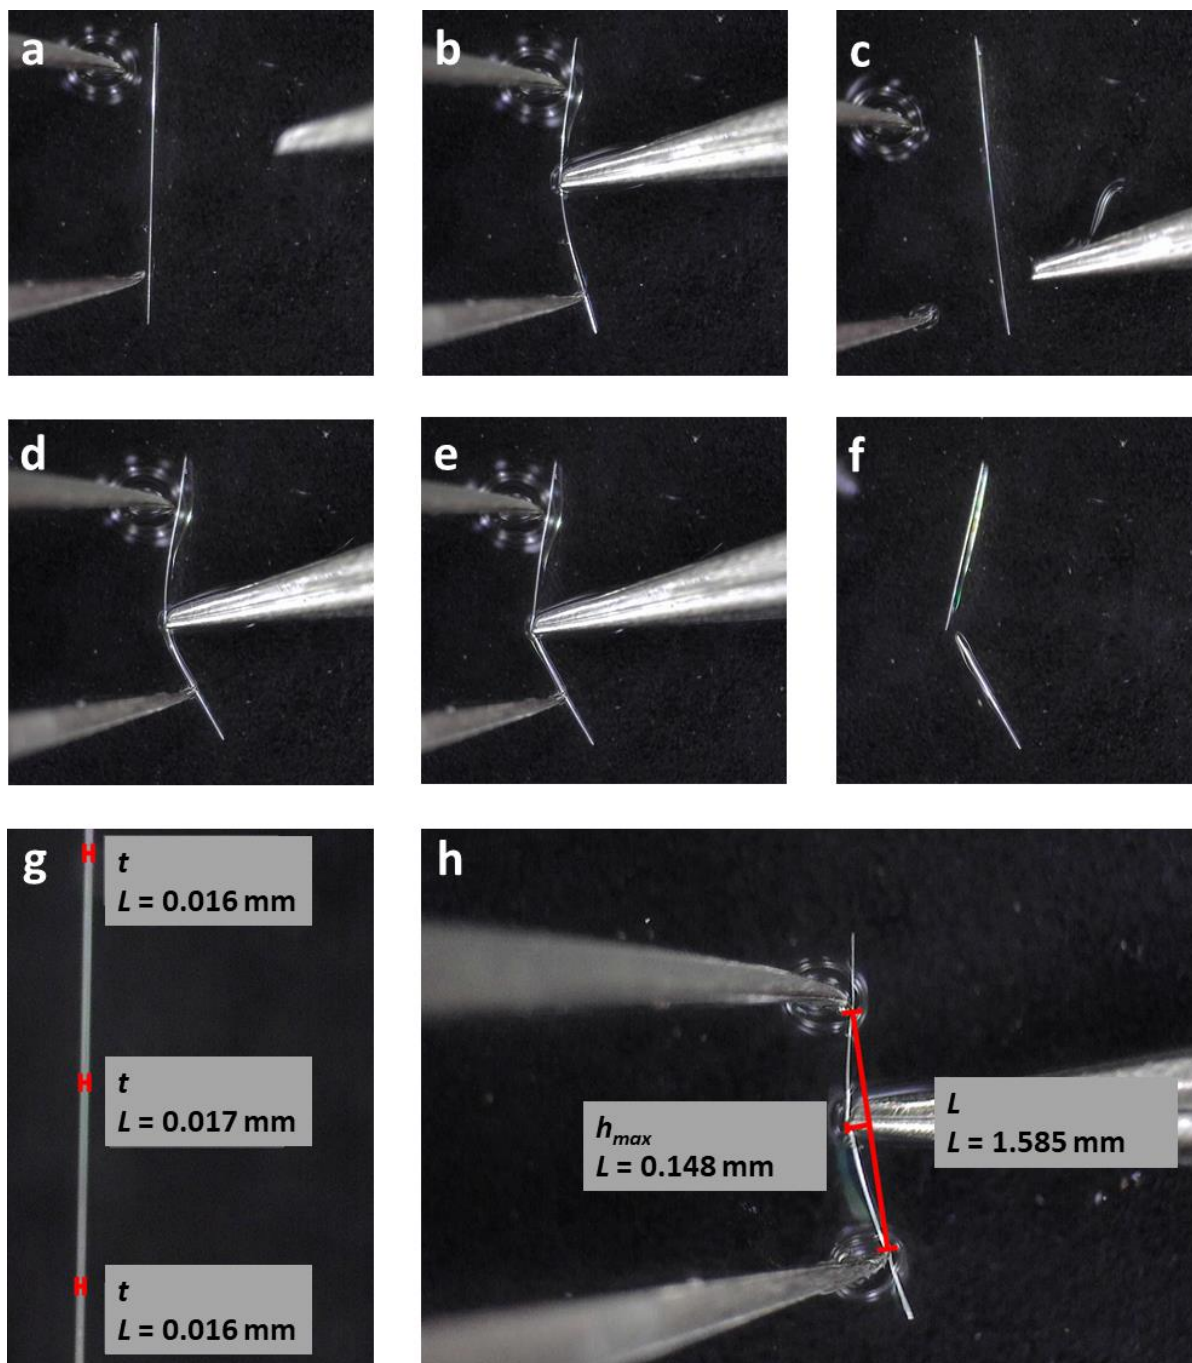

**Figure S6.** Bending experiment with  $[\text{CdCl}_2(3\text{-Brpy})_2]_n$  (**2**, sample **2-1**; images a-f, h magnified 50 times; image g magnified 200 times),  $\varepsilon = 0.46\%$ . Slight elastic bending of the crystal followed by relaxation (a–c); crystal fractures once bent over the critical radius (d–f). Geometrical parameters: (g) thickness  $t$ , (h) length  $L$  and maximal displacement  $h$

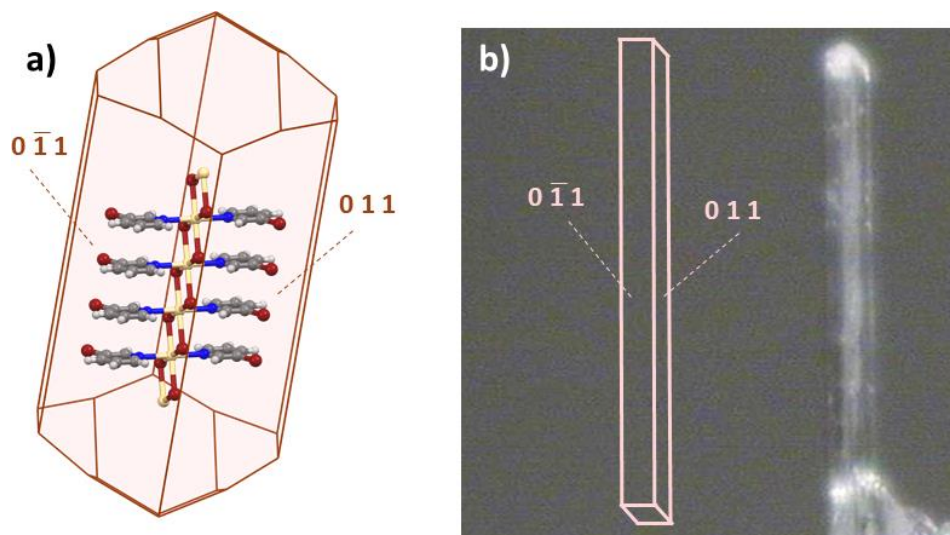

**Figure S7.** Face indexing (a) and calculated BFDH morphology (using Mercury 4.3.1)<sup>3</sup> (b) for crystals of  $[\text{CdBr}_2(3\text{-Brpy})_2]_n$  (**3**).

**Table S5.** Geometrical parameters used to calculate bending strain ( $\epsilon$ ). The mean value of the bending strain (shown in red) was determined on the basis of measurements of ten different crystals for the compound **3** (from several different batches) by applying mechanical force on the  $(011)/(0\bar{1}\bar{1})$  or  $(0\bar{1}1)/(01\bar{1})$  pair of crystal faces. Thickness ( $t$ ) of the selected crystals was measured before bending, length ( $L$ ) and maximal displacement ( $h_{\text{max}}$ ) were measured at the point of maximal curvature (see Figure S8 below).

| Sample  | $\bar{t}$ / mm | $L$ / mm | $h_{\text{max}}$ / mm | $R$ / mm | $\epsilon$ / mm    |
|---------|----------------|----------|-----------------------|----------|--------------------|
| 3-1     | 0.021          | 1.965    | 0.303                 | 1.744    | <b>0.60</b>        |
| 3-2     | 0.011          | 1.720    | 0.314                 | 1.335    | <b>0.41</b>        |
| 3-3     | 0.027          | 1.708    | 0.141                 | 2.657    | <b>0.51</b>        |
| 3-4     | 0.013          | 1.658    | 0.450                 | 0.989    | <b>0.66</b>        |
| 3-5     | 0.034          | 2.032    | 0.219                 | 2.466    | <b>0.69</b>        |
| 3-6     | 0.025          | 2.160    | 0.265                 | 2.333    | <b>0.54</b>        |
| 3-7     | 0.021          | 1.977    | 0.307                 | 1.745    | <b>0.60</b>        |
| 3-8     | 0.026          | 2.202    | 0.307                 | 2.128    | <b>0.62</b>        |
| 3-9     | 0.020          | 1.604    | 0.184                 | 1.840    | <b>0.53</b>        |
| 3-10    | 0.014          | 1.653    | 0.468                 | 0.964    | <b>0.71</b>        |
| average |                |          |                       |          | <b>0.59 ± 0.09</b> |

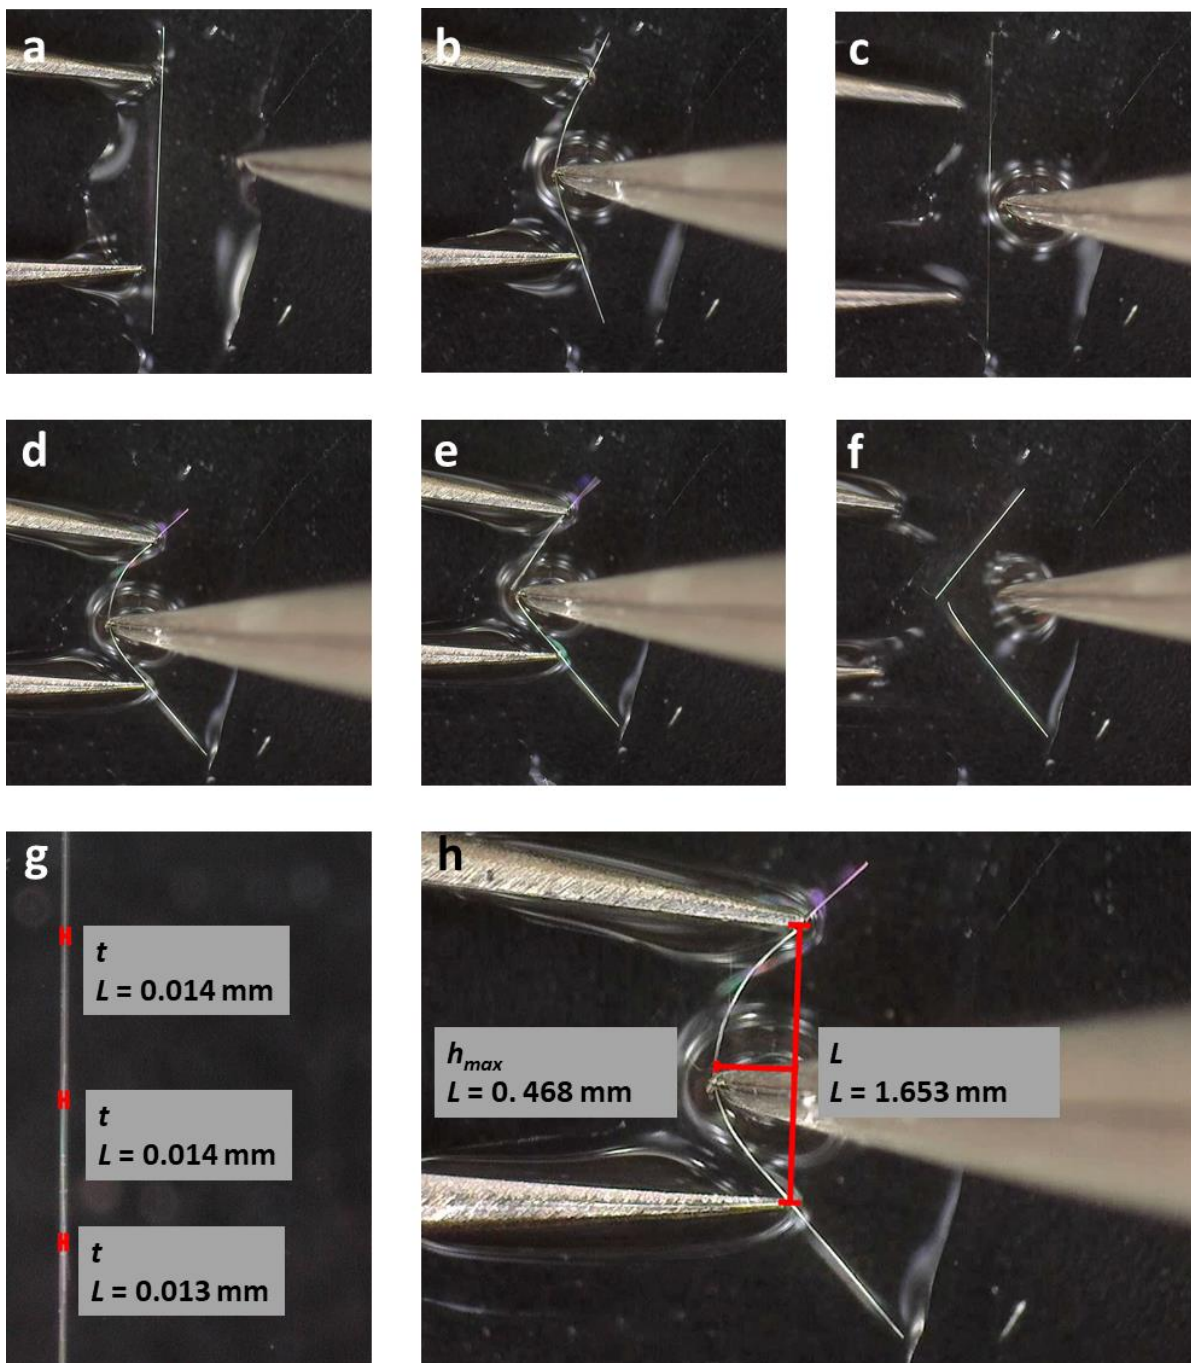

**Figure S8.** Bending experiment with  $[\text{CdBr}_2(3\text{-Brpy})_2]_n$  (**3**, sample **3-10**; images a-f, h magnified 50 times; image g magnified 200 times),  $\varepsilon = 0.71\%$ . Slight elastic bending of the crystal followed by relaxation (a–c); crystal fractures once bent over the critical radius (d–f) with slightly plastically deformed ends of broken crystal (f). Geometrical parameters: (g) thickness  $t$ , (h) length  $L$  and maximal displacement  $h$ .

#### 4. Atomic force microscopy

The Young's moduli of straight crystals **1–3** shown in Table S6 are averaged values of Young's moduli acquired from fitting force-separation curves (at least 1500 data points were collected) for each compound.

**Table S6.** Young's moduli obtained on straight crystals of **1–3**.

| <b>Compound</b>                                   | <b><i>E</i>/ GPa</b>              |
|---------------------------------------------------|-----------------------------------|
| $[\text{CdCl}_2(3\text{-Clpy})_2]_n$ ( <b>1</b> ) | <b><math>3.58 \pm 1.02</math></b> |
| $[\text{CdCl}_2(3\text{-Brpy})_2]_n$ ( <b>2</b> ) | <b><math>9.50 \pm 2.15</math></b> |
| $[\text{CdBr}_2(3\text{-Brpy})_2]_n$ ( <b>3</b> ) | <b><math>4.55 \pm 0.85</math></b> |

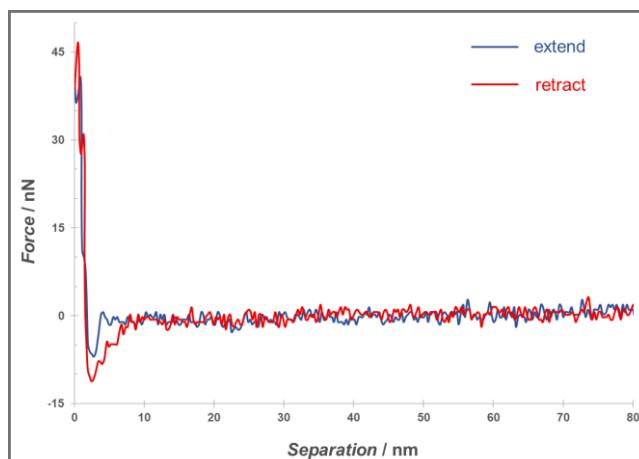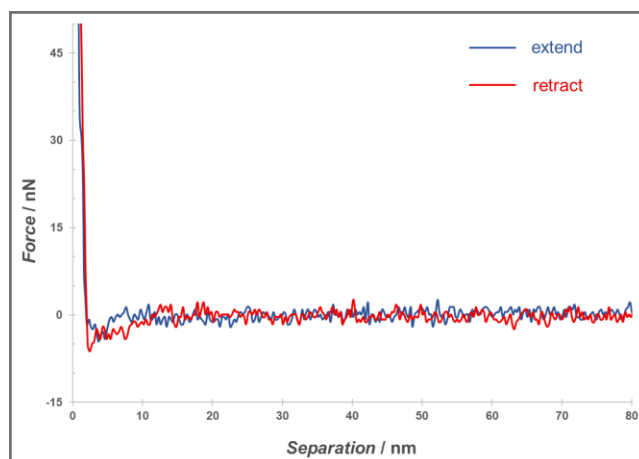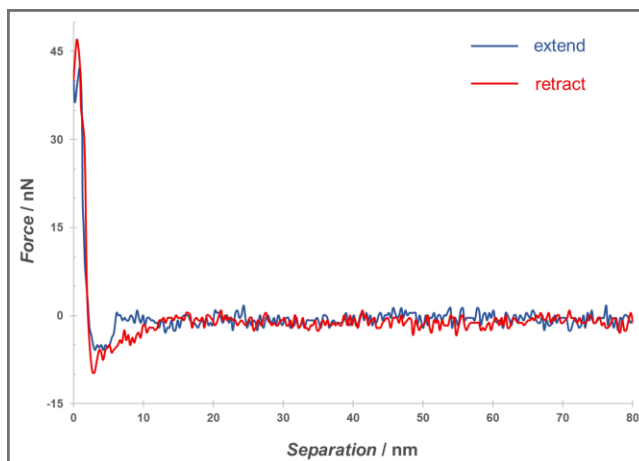

**Figure S9.** Force distance curves for [CdCl<sub>2</sub>(3-Clpy)<sub>2</sub>]<sub>n</sub> (**1**) (top), [CdCl<sub>2</sub>(3-Brpy)<sub>2</sub>]<sub>n</sub> (**2**) (middle) and [CdBr<sub>2</sub>(3-Brpy)<sub>2</sub>]<sub>n</sub> (**3**) (bottom).

## 5. Computational study

The interactions between 1-D coordination polymers were calculated in the way that each adjacent 1-D coordination polymer was truncated from the crystal structure as an electroneutral chain made of three metal centres to obtain more representative results in comparison with only one metal centre. In **model I**, terminal metal centres were not octahedrally coordinated, but two halides were left out from the structure to retain electroneutrality. Very similar trends (see  $\Delta E_{\text{int}}$  values in Tables S7 and S8) were obtained for **models II** and **III** in which negative charge on the terminal octahedrally coordinated metal centres were neutralized via capping by cationic species (like  $\text{H}^+$  and  $\text{Na}^+$ ). Due to almost the same  $\Delta E_{\text{int}}$  values in all three models, we have opted to pursue the structurally simpler **model I**.

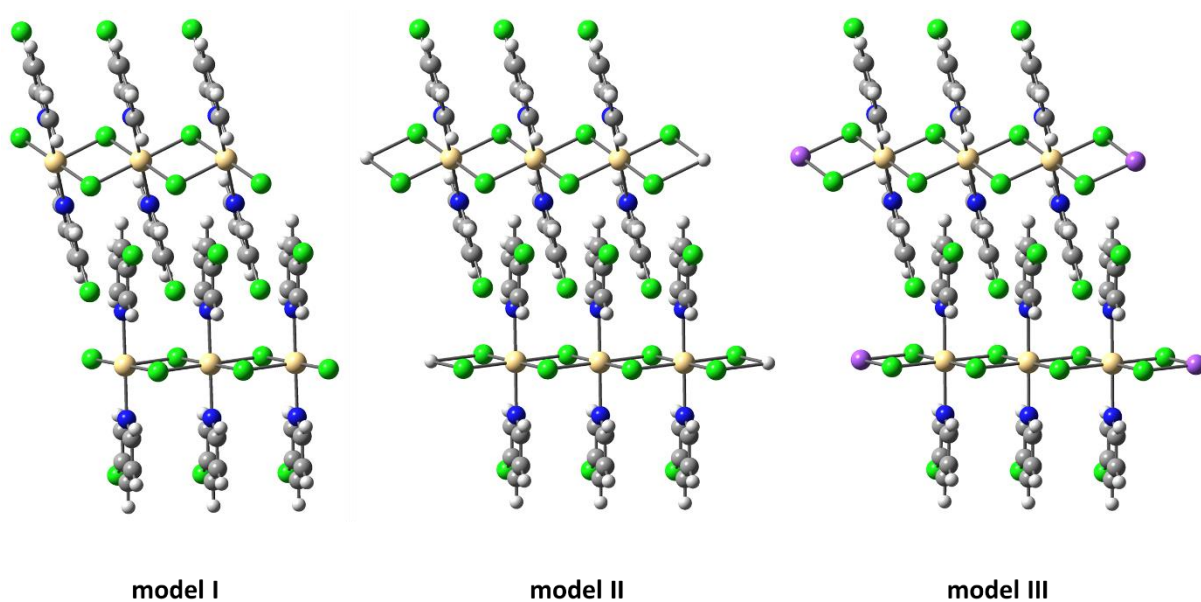

**Figure S10.** Three models used for calculation of interaction energies between single pairs of the truncated 1-D coordination polymers (trimeric units) of compounds **1** and **3**. All three models included electroneutral chains. In **model I** two terminal halides were left out, while **model II** and **model III** involved trimeric units terminally capped by two cations,  $\text{H}^+$  or  $\text{Na}^+$ , respectively.



**Table S7.** Interaction energies (describing **A** type, Figure 5) and energy differences between the single pairs of the truncated 1-D coordination polymers of compounds **1** and **3**.

| <b>model</b> | $E_{\text{int}} / \text{kJ mol}^{-1}$<br><b>compound 1</b> | $E_{\text{int}} / \text{kJ mol}^{-1}$<br><b>compound 3</b> | $\Delta E_{\text{int}} / \text{kJ mol}^{-1}$ |
|--------------|------------------------------------------------------------|------------------------------------------------------------|----------------------------------------------|
| <b>I</b>     | -30.68                                                     | -35.31                                                     | 4.63                                         |
| <b>II</b>    | -25.93                                                     | -30.21                                                     | 4.28                                         |
| <b>III</b>   | -27.87                                                     | -32.77                                                     | 4.90                                         |

**Table S8.** Interaction energies (describing **B** type, Figure 5) and energy differences between the single pairs of the truncated 1-D coordination polymers of compounds **1** and **3**.

| <b>model</b> | $E_{\text{int}} / \text{kJ mol}^{-1}$<br><b>compound 1</b> | $E_{\text{int}} / \text{kJ mol}^{-1}$<br><b>compound 3</b> | $\Delta E_{\text{int}} / \text{kJ mol}^{-1}$ |
|--------------|------------------------------------------------------------|------------------------------------------------------------|----------------------------------------------|
| <b>I</b>     | -8.67                                                      | -7.20                                                      | -1.47                                        |
| <b>II</b>    | -9.34                                                      | -7.84                                                      | -1.49                                        |
| <b>III</b>   | -9.89                                                      | -8.47                                                      | -1.42                                        |

$[\text{CdCl}_2(3\text{-Clpy})_2]_n$  (1)

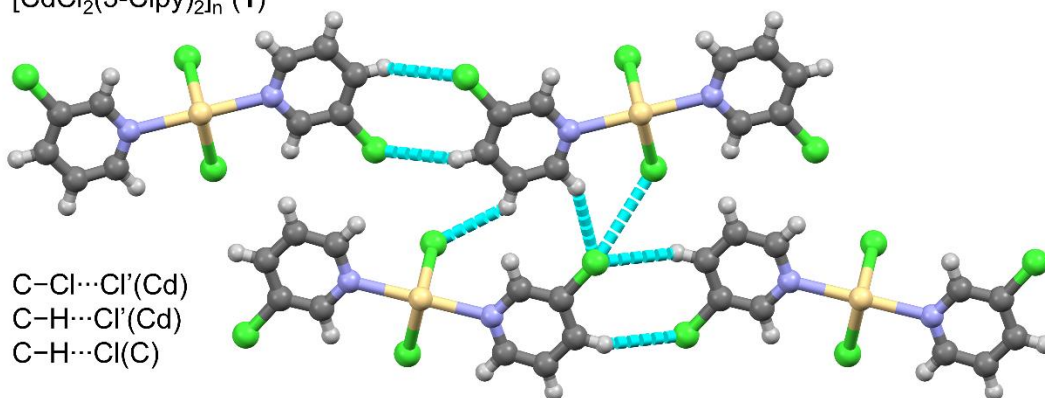

$[\text{CdCl}_2(3\text{-Brpy})_2]_n$  (2)

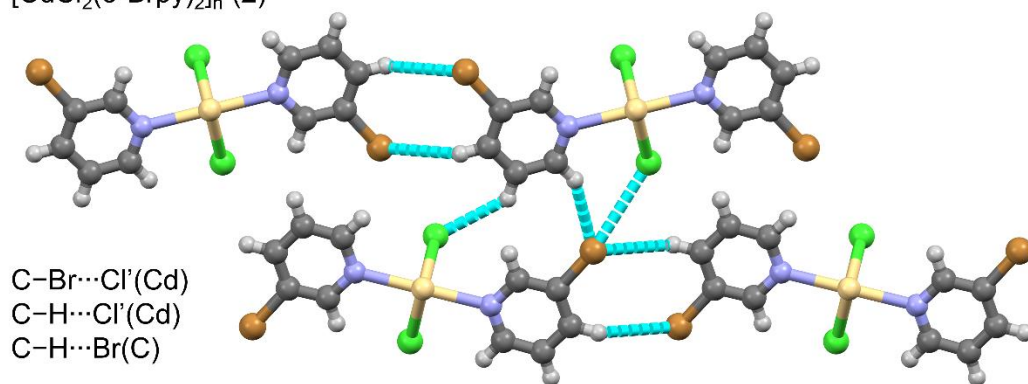

$[\text{CdBr}_2(3\text{-Brpy})_2]_n$  (3)

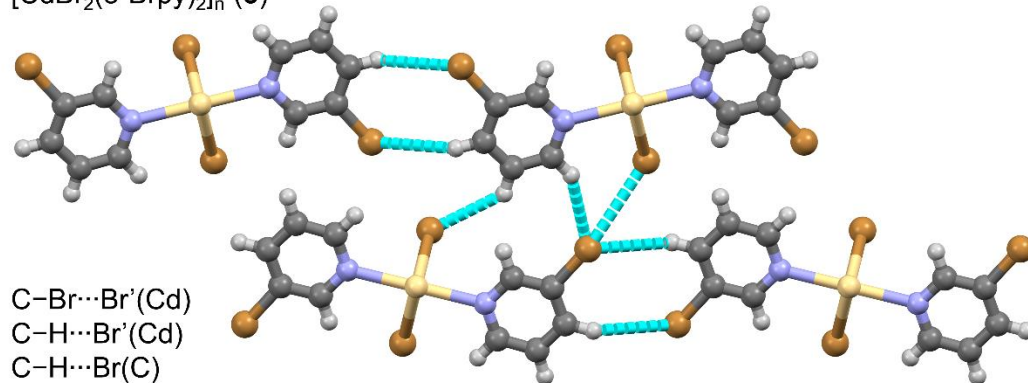

**Figure S11.** Intermolecular interactions (model **C**, Figure 5) between double pairs of truncated 1-D coordination polymers in compounds **1–3**.

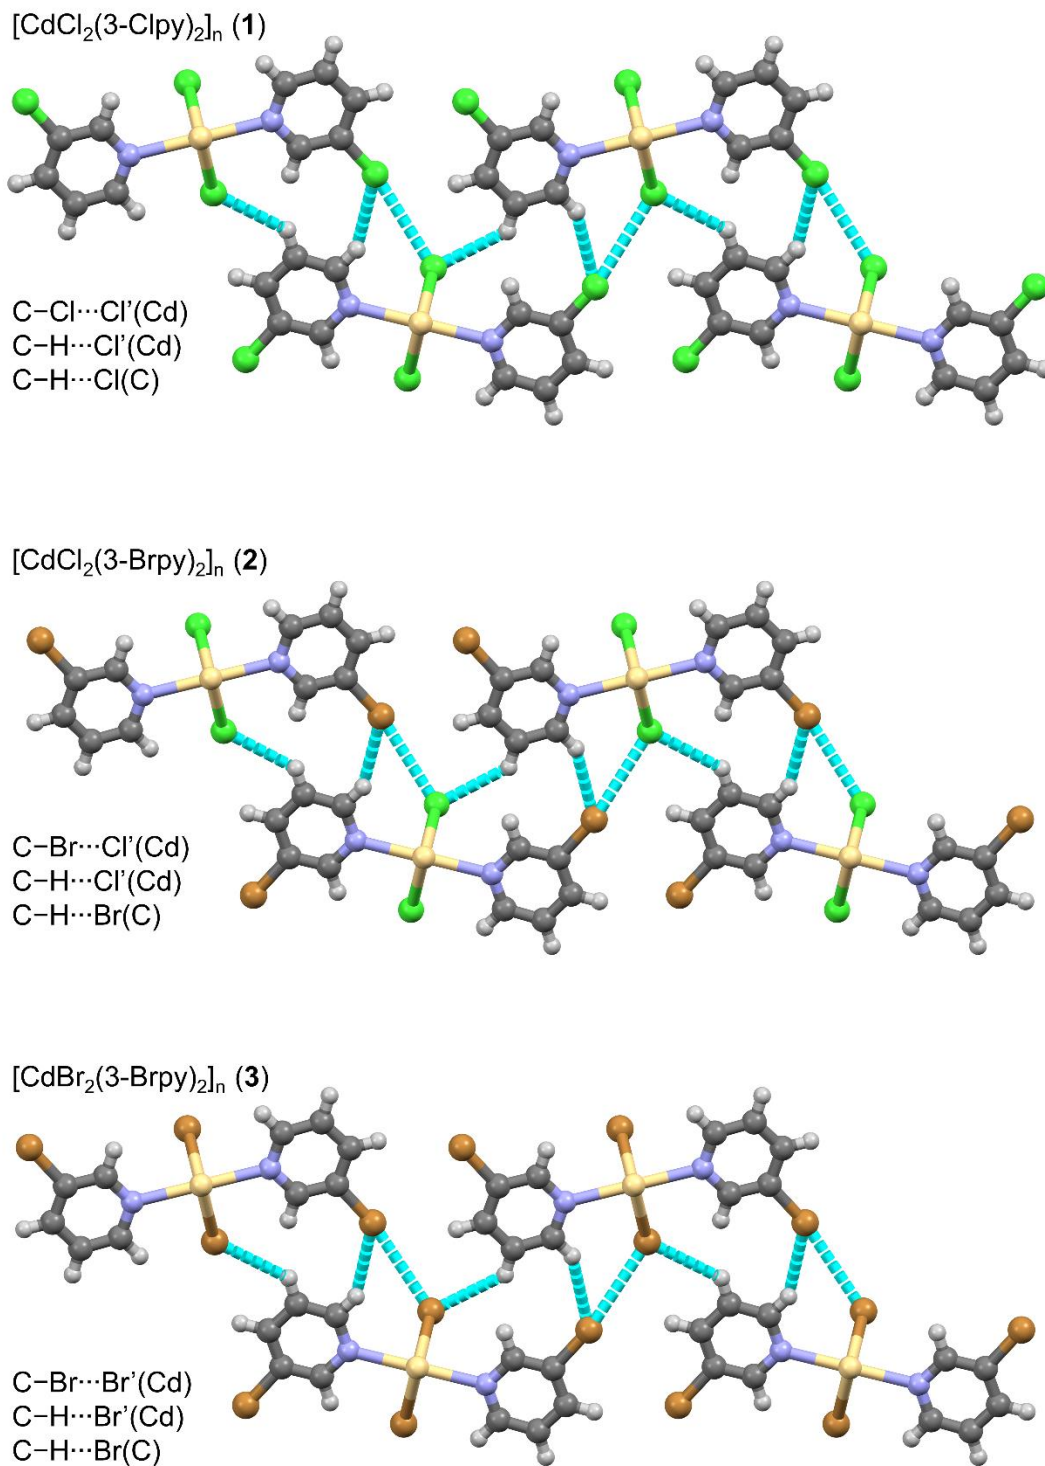

**Figure S12.** Intermolecular interactions (model **D**, Figure 5) between double pairs of truncated 1-D coordination polymers in compounds **1–3**.

## 6. References

<sup>1</sup> Lommerse, J. P. M.; Stone, A. J.; Taylor, R.; Allen, F. H., *J. Am. Chem. Soc.*, 1996, **118**, 3108.

<sup>2</sup> Timoshenko, S. *Strength of materials*, D. Van Nostrand Company, New York, 1940.

<sup>3</sup> C. F. Macrae, I. Sovago, S. J. Cottrell, P. T. A. Galek, P. McCabe, E. Pidcock, M. Platings, G. P. Shields, J. S. Stevens, M. Towler, P. A. Wood, *J. Appl. Cryst.*, 2020, **53**, 226.
